# Supplementary material for: Poly(l-lactide)-Based Anti-Inflammatory Responsive Surfaces for Surgical Implants
Source: PubMed Central journal article supplement (PMC7794694; doi:10.3390/polym13010034), 2020-12-24
Supplement: polymers-13-00034-s001.pdf [file polymers-13-00034-s001.pdf]

Supporting Information

# PLLA Based anti-inflammatory responsive surfaces for surgical implants

**Julia Sánchez-Bodón<sup>1</sup>, Leire Ruiz-Rubio<sup>1,2</sup>, Estíbaliz Hernaez-Laviña<sup>1</sup>, José Luis Vilas-Vilela<sup>1,2</sup>  
and M<sup>a</sup> Isabel Moreno-Benítez<sup>3</sup>**

<sup>1</sup> Macromolecular Chemistry Group (LABQUIMAC), Department of Physical Chemistry, Faculty of Science and Technology, University of the Basque Country, UPV/EHU, Barrio Sarriena s/n 48940 Leioa, Spain; [julia.sanchez@ehu.eus](mailto:julia.sanchez@ehu.eus) (J.S.-B.), [leire.ruiz@ehu.eus](mailto:leire.ruiz@ehu.eus) (L.R.-R.), [estibaliz.hernaez@ehu.eus](mailto:estibaliz.hernaez@ehu.eus) (E.H.-L.), [jose Luis.vilas@ehu.eus](mailto:jose Luis.vilas@ehu.eus) (J.L.V.-V.)

<sup>2</sup> BCMaterials, Basque Center for Materials, Applications and Nanostructures, UPV/EHU Science Park, 48940 Leioa, Spain

<sup>3</sup> Macromolecular Chemistry Group (LABQUIMAC), Department of Organic Chemistry II, Faculty of Science and Technology, University of the Basque Country, UPV/EHU, Barrio Sarriena s/n 48940 Leioa, Spain; [mariaisabel.moreno@ehu.eus](mailto:mariaisabel.moreno@ehu.eus) (M.I.M.-B.)

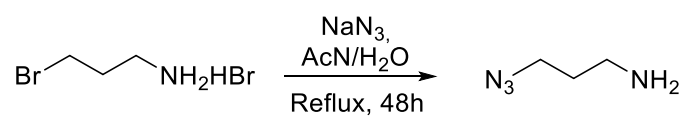

Scheme S1. Synthetic route of 3-azidopropan-1-amine.

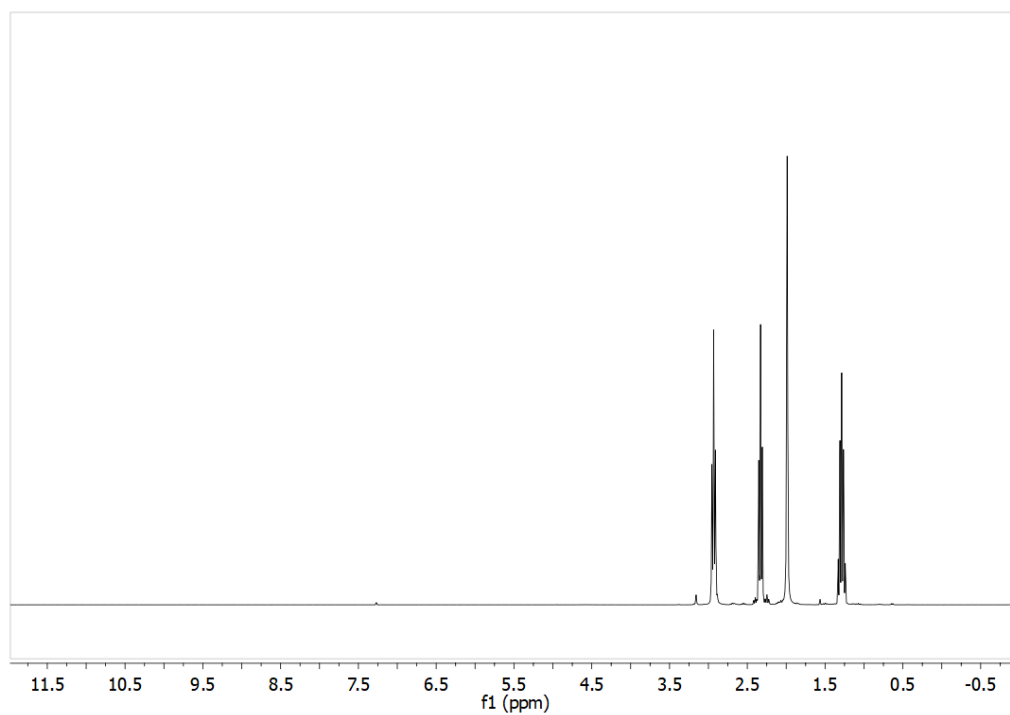

Figure S1. <sup>1</sup>H-NMR spectrum of 3-azidopropan-1-amine.

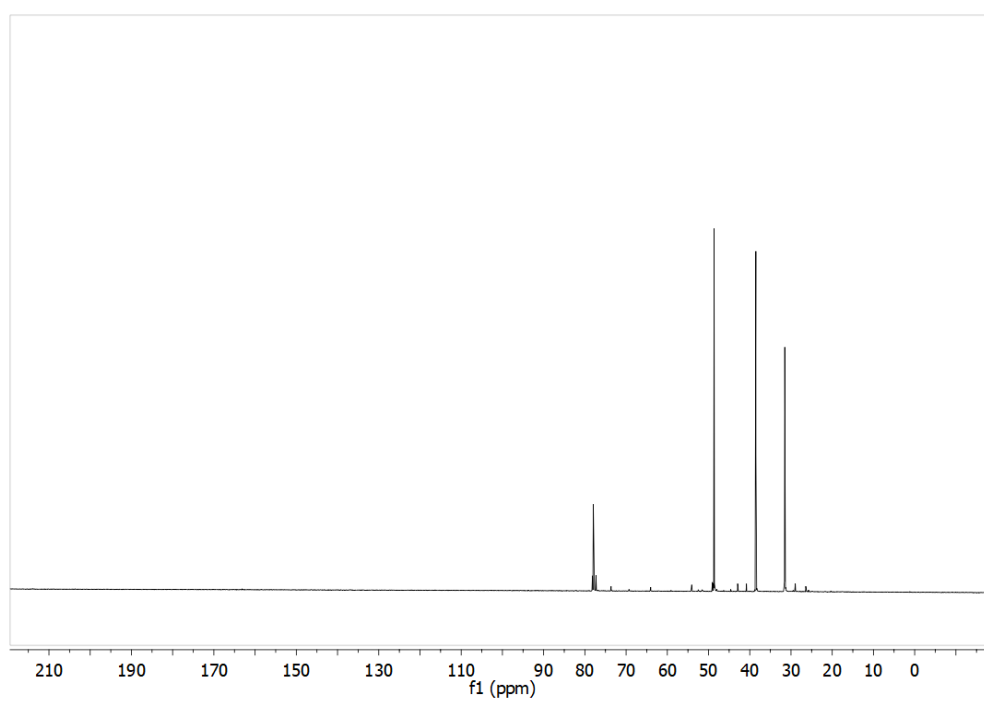

Figure S2. <sup>13</sup>C-NMR spectrum of 3-azidopropan-1-amine.

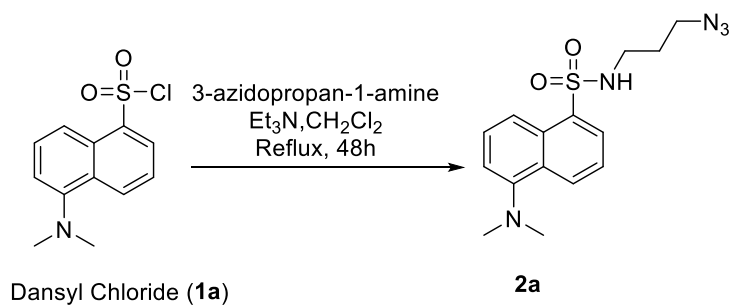

Scheme S2. Synthetic route of *N*-(3-azidopropyl)-5-(dimethylamino)naphthalene-1-sulfonamide (**2a**).

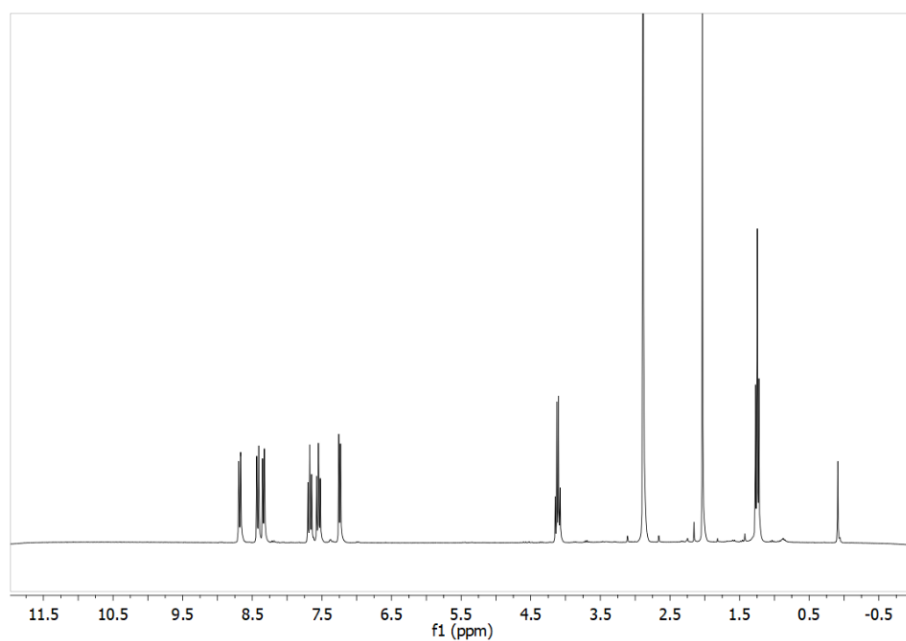

Figure S3. <sup>1</sup>H-NMR spectrum of *N*-(3-azidopropyl)-5-(dimethylamino)naphthalene-1-sulfonamide (**2a**).

Supporting Information

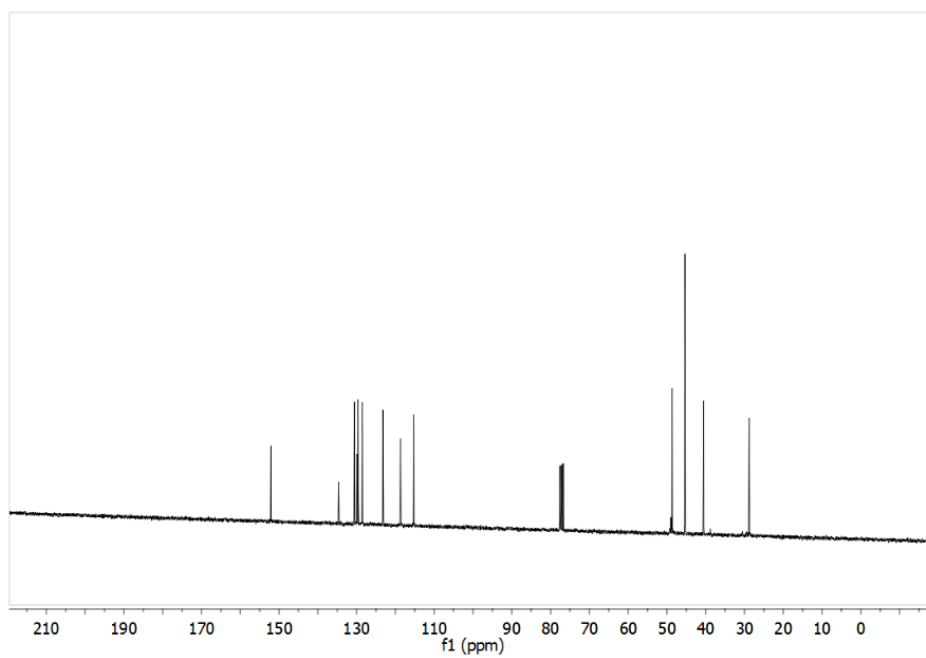

Figure S4.  $^{13}\text{C}$ -NMR spectrum of *N*-(3-azidopropyl)-5-(dimethylamino)naphthalene-1-sulfonamide (2a).

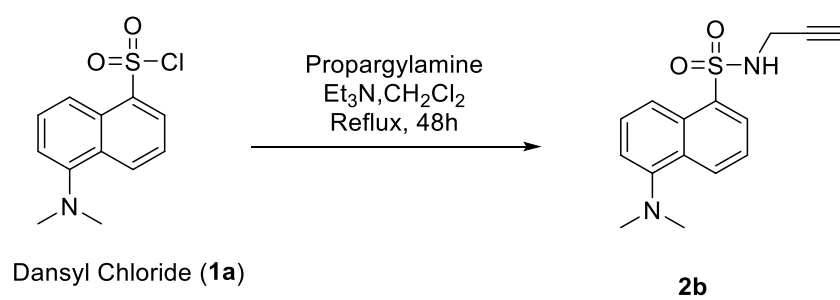

Scheme S3. Synthetic route of 5-(dimethylamino)-*N*-(prop-2-yn-1-yl)naphthalene-1-sulfonamide (**2b**).

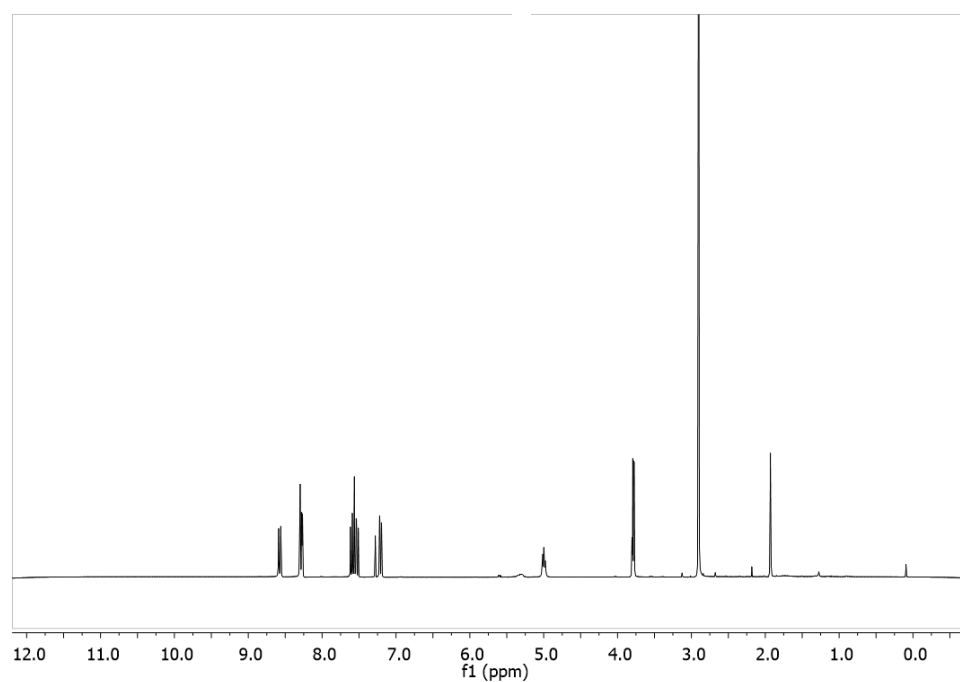

Figure S5. <sup>1</sup>H-NMR spectrum of 5-(dimethylamino)-*N*-(prop-2-yn-1-yl)naphthalene-1-sulfonamide (**2b**).

Supporting Information

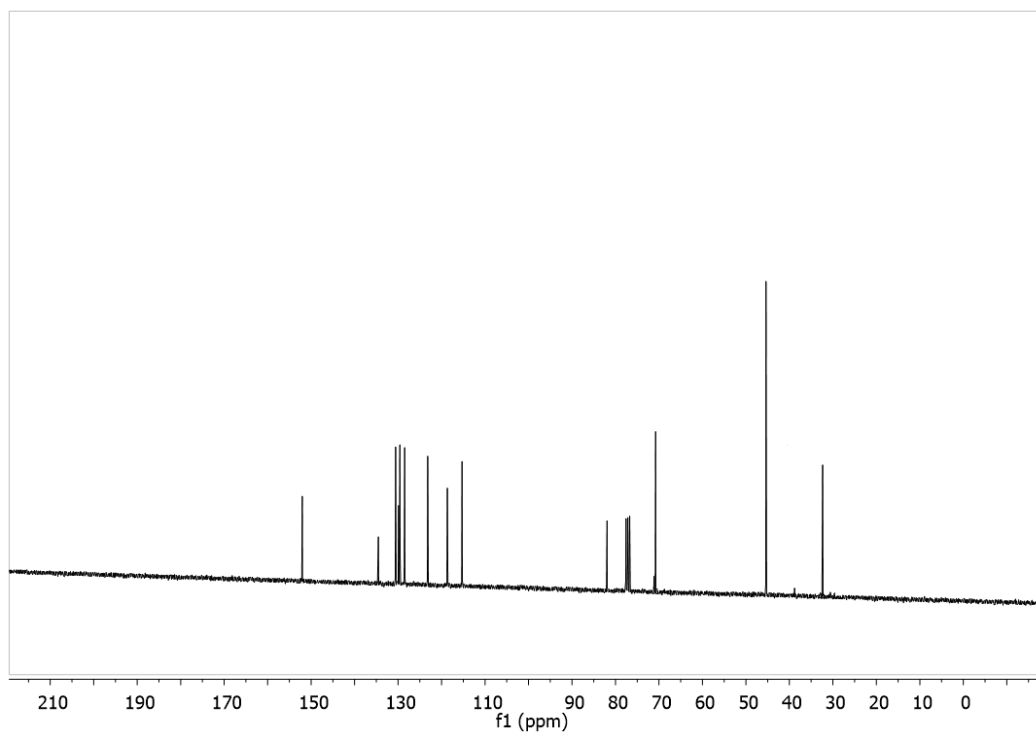

Figure S6.  $^{13}\text{C}$ -NMR spectrum of 5-(dimethylamino)-*N*-(prop-2-yn-1-yl)naphthalene-1-sulfonamide (2b).

Supporting Information

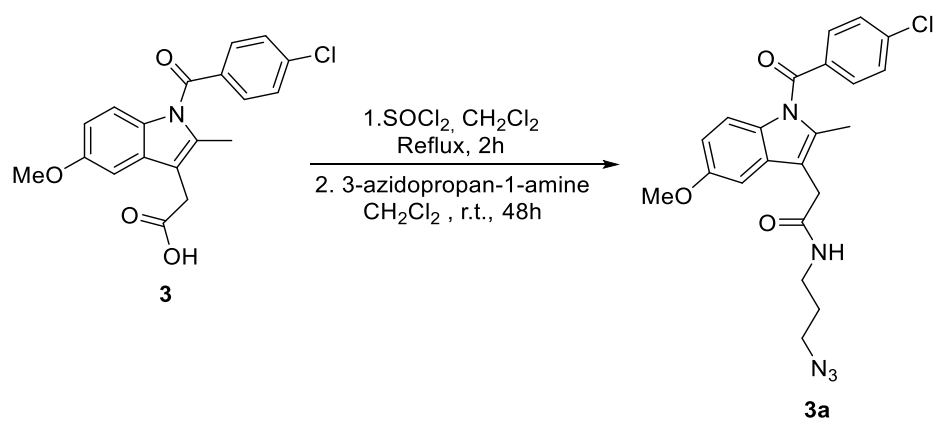

Scheme S4. Synthetic route of *N*-(3-azidopropyl)-2-(1-(4-chlorobenzoyl)-5-methoxy-2-methyl-1H-indol-3-yl)acetamide.

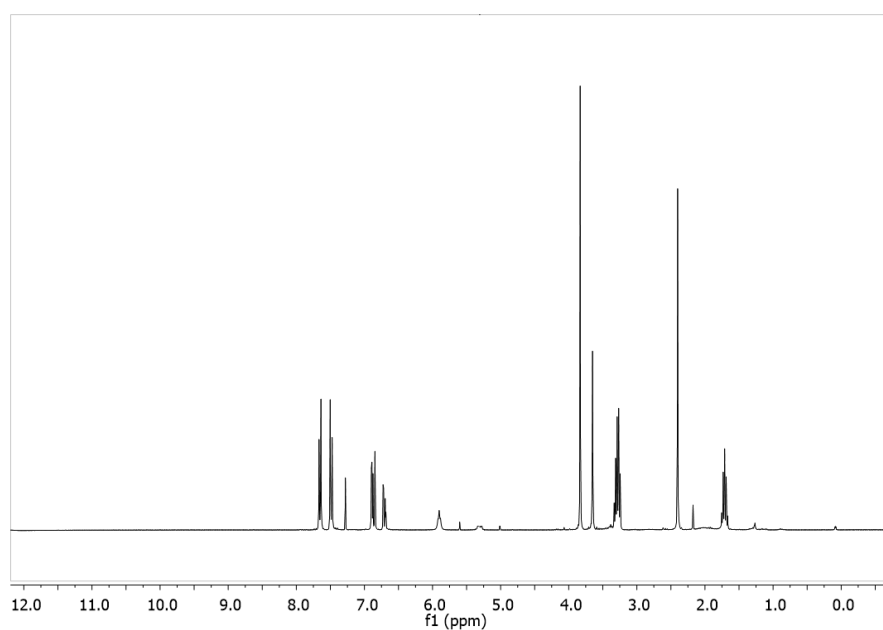

Figure S7. <sup>1</sup>H-NMR spectrum of *N*-(3-azidopropyl)-2-(1-(4-chlorobenzoyl)-5-methoxy-2-methyl-1H-indol-3-yl)acetamide (**3a**).

Supporting Information

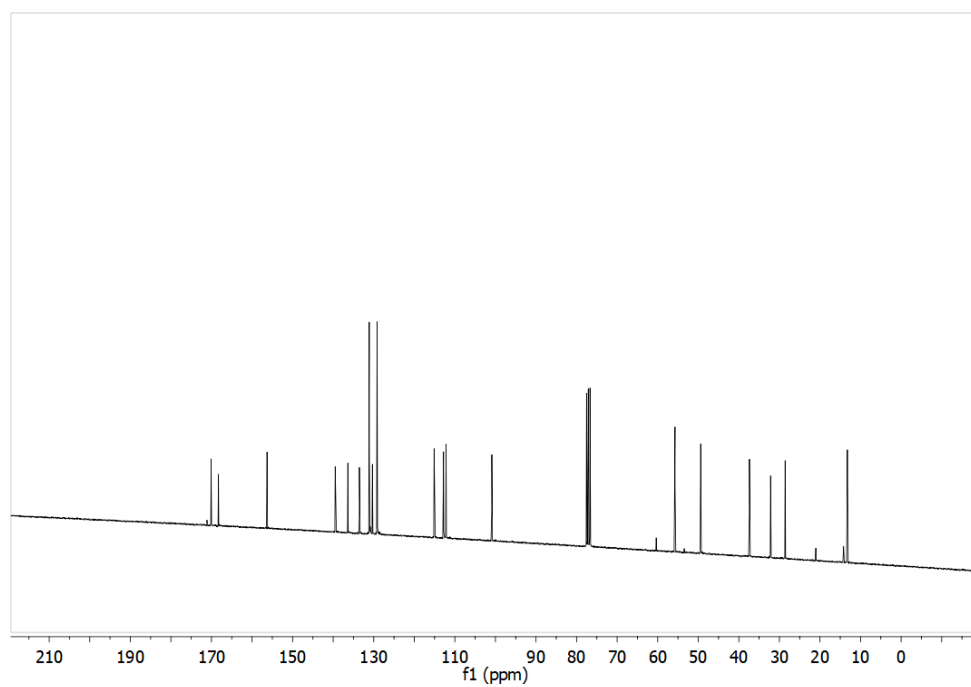

Figure S8.  $^{13}\text{C}$ -NMR spectrum of *N*-(3-azidopropyl)-2-(1-(4-chlorobenzoyl)-5-methoxy-2-methyl-1H-indol-3-yl)acetamide(3a).
